# Supplementary material
Source: publisher figshare collection journal article supplement (https://rs.figshare.com/ndownloader/files/21356538)
Supplement: Supplementary file 1 [file 21356538]

ID	condition	numberYawns	trial	secs
Axl	Pro-Social	0	2	300
Smith	Pro-Social	0	2	300
Dice	Pro-Social	0	1	300
Tweed	Pro-Social	0	2	300
Plum	Pro-Social	0	1	300
Jack	Pro-Social	0	1	300
Kohi	Pro-Social	0	2	300
Manny	Pro-Social	0	2	300
Meg	Pro-Social	1	1	300
Ruby	Pro-Social	1	1	300
Scotty	Pro-Social	2	1	300
Opie	Pro-Social	1	1	300
Richie	Pro-Social	0	1	300
Poppy	Pro-Social	0	2	300
Babe	Pro-Social	0	2	300
Jett	Pro-Social	1	1	300
Skater	Pro-Social	0	2	300
Uisce	Pro-Social	1	2	300
Ruby2	Pro-Social	3	2	300
Sam	Pro-Social	0	1	300
Camilla	Pro-Social	2	1	300
George	Pro-Social	1	2	300
Millie	Pro-Social	3	1	300
Bella	Pro-Social	1	2	300
Crash	Pro-Social	1	1	300
Doug	Pro-Social	0	2	300
Ivy	Pro-Social	1	2	300
Kobe	Pro-Social	1	2	300
Max	Pro-Social	1	1	300
Pales	Pro-Social	2	1	300
Honey	Pro-Social	0	2	300
Fern	Pro-Social	1	2	300
Axl	Anti-Social	2	1	300
Smith	Anti-Social	0	1	300
Dice	Anti-Social	0	2	300
Tweed	Anti-Social	0	1	300
Plum	Anti-Social	3	2	300
Jack	Anti-Social	2	2	300
Kohi	Anti-Social	0	1	300
Manny	Anti-Social	1	1	300
Meg	Anti-Social	0	2	300
Ruby	Anti-Social	1	2	300
Scotty	Anti-Social	3	2	300
Opie	Anti-Social	0	2	300
Richie	Anti-Social	0	2	300
Poppy	Anti-Social	0	1	300
Babe	Anti-Social	0	1	300
Jett	Anti-Social	1	2	300
Skater	Anti-Social	1	1	300
Uisce	Anti-Social	2	1	300
Ruby2	Anti-Social	1	1	300
Sam	Anti-Social	0	2	300
Camilla	Anti-Social	0	2	300
George	Anti-Social	1	1	300
Millie	Anti-Social	1	2	300
Bella	Anti-Social	3	1	300
Crash	Anti-Social	1	2	300
Doug	Anti-Social	3	1	300
Ivy	Anti-Social	0	1	300
Kobe	Anti-Social	1	1	300
Max	Anti-Social	2	2	300
Pales	Anti-Social	1	2	300
Honey	Anti-Social	2	1	300
Fern	Anti-Social	0	1	300
